# Supplementary material
Source: publisher site journal article supplement (https://www.spandidos-publications.com/8156/downloadSupplementary)
Supplement: Supplementary file 1 [file downloadSupplementary]

## Sheet: Table SI
Table SI. Wogonin targets from various databases.
SwisstTargetPrediction	PharmMapper	SuperPred	Similarity Ensemble Approach	After removing duplicate targets from the four databases
PTGS2	HCK	APEX1	CREB1	PTGS2
NOS2	CAH2	ALOX12	CP1B1	NOS2
FLT3	CAH1	CTSD	TPMT	FLT3
AKR1B1	EST1	TRIM24	CP1A1	AKR1B1
OPRD1	CHLE	KLF5	PTPRS	OPRD1
KIT	ANGI	DUSP3	ABCG2	KIT
ABCB1	LYAM3	THRA	XDH	ABCB1
IKBKB	ESR1	HDAC8	MDR1	IKBKB
NTRK2	ALBU	TOP2A	CCNO	NTRK2
KDM4E	APOA2	RORB	ANTR2	KDM4E
XDH	STS	CSNK2B	PLGF	XDH
ALOX15	GLCM	HSD17B10	CCNE2	ALOX15
CDK1	CAH12	HIF1A	AMY1A	CDK1
ALOX12	CDK6	CDK1	KCND3	ALOX12
GRK6	EGFR	TDP1	TNKS1	GRK6
CYP19A1	EPHB4	NR1I2	CBR1	CYP19A1
ESR2	NGAL	SLC6A5	CBS	ESR2
CYP1A1	AMPM1	CAMKK2	ELAV1	CYP1A1
OPRM1	BRAF1	MAOA	VRK2	OPRM1
ABCG2	TTHY	TTR	MAT1	ABCG2
ESR1	DUS6	CHRM5	ELAV3	ESR1
EGFR	CCNA2	STAT1	TERT	EGFR
SLC22A12	NOS3	CACNA1B	CCNT1	SLC22A12
CYP1B1	PDE4D	SLC2A1	CCNB1	CYP1B1
CA4	ADA17	CHRM4	CALM1	CA4
CA2	PIM1	CDK5	GRK6	CA2
CA1	CFAB	CDC25C	AHR	CA1
MCL1	MIF	NFE2L2	CCNA2	MCL1
PIK3CG	THRB	KCNA5	MAK	PIK3CG
PIM1	NQO1	SERPINE1	SGMR1	PIM1
ADORA1	ANDR	ADAM10	MRP1	ADORA1
ADORA2A	PDE5A	GPR55	AVR2A	ADORA2A
HSD17B2	SHBG	ZAP70	CCNK	HSD17B2
HSD17B1	DYR	GBA2	LOX5	HSD17B1
CA7	CHK1	ANPEP	DCOR	CA7
CA12	LKHA4	GGPS1	CD5R1	CA12
CDK5R1	ALDR	PDE11A	CDKL5	CDK5R1
CCNB3	CACP	GPBAR1	KCC4	CCNB3
CDK6	PNPH	PRCP	CDK9	CDK6
CA9	AKT1	PIN1	CDK13	CA9
CBR1	RXRA	CDK1	KC1AL	CBR1
TERT	BAG1	PSMB1	MRCKB	TERT
AR	AK1C3	EIF2AK1	ST32A	AR
CA6	PPARG	ERAP1	CCND1	CA6
PTPRS	CTNA1	NQO2	PI51C	PTPRS
DAPK1	PDPK1	CFTR	AK1BA	DAPK1
MPG	MCR	CYP3A4	NOX4	MPG
PFKFB3	BACE1	DRD1	TNKS2	PFKFB3
MMP9	ADHX	NOX1	ESR2	MMP9
MMP2	VTDB	C5AR1	CAH13	MMP2
LCK	FGFR1	CHRM1	CDK15	LCK
MMP12	DCK	GLS	CDK5	MMP12
CD38	ISG20	GUSB	DOPO	CD38
TOP1	CBR1	GLRA1	AOFA	TOP1
ARG1	UROK	MIF	AVR2B	ARG1
MAPT	CCNT1	DPP9	CDK18	MAPT
TOP2A	MMP8	FPR1	COMT	TOP2A
INSR	KIF11	PTGER1	BGLR	INSR
DRD4	FA10	RPS6KA1	CATL2	DRD4
MYLK	PTN1	MDM4	SIAT1	MYLK
MPO	GSK3B	CAPN1	PRKDC	MPO
PIK3R1	HS90A	GABRA1	CILK1	PIK3R1
PYGL	TGM2	CLK4	VEGFA	PYGL
MMP13	SAHH	NFKB1	CDK14	MMP13
MMP3	HXK1	CHKA	DUSTY	MMP3
CA3	PTN11	CDK5	NR4A2	CA3
CA14	PH4H	METAP2	CDK17	CA14
MET	IMDH2	GRK5	ANDR	MET
CA13	PRGR	LGALS3	STK35	CA13
CAMK2B	CATB	ITK	CELA1	CAMK2B
PLA2G1B	PDE4B	PDGFRA	LOX12	PLA2G1B
CA5A	CFAD	PTPN11	CAH7	CA5A
APEX1	MMP12	CHUK	ACVR1	APEX1
AKR1C2	SRC	KAT6A	CDK1	AKR1C2
AKR1C1	PDE3B	DPP7	KKCC1	AKR1C1
AKR1C3	JAK2	NTRK3	CCNE1	AKR1C3
AKR1C4	ACK1	F13A1	CCNH	AKR1C4
AKR1A1	CDD	TFPI	DMPK	AKR1A1
GPR35	DHI1	KEAP1	LTK	GPR35
ODC1	MMP7	ACE	GRK1	ODC1
HSP90AA1	MMP3		CDK2	HSP90AA1
ALOX5	KSYK		DCLK3	ALOX5
CXCR1	AMPM2		MK15	CXCR1
PLA2G2A	PTGD2		SL9A1	PLA2G2A
SRC	NR1H2		KDM4E	SRC
APP	GSTP1		NQO1	APP
CYP1A2	TGM3		TTHY	CYP1A2
ADORA3	PDK2		MP2K3	ADORA3
HSP90B1	RB11A		PHKG1	HSP90B1
ABCC1	TPIS		ULK2	ABCC1
TNKS	FKB1A		ALDR	TNKS
TTR	CP2C9		EPHA5	TTR
NOX4	FA7		GRK7	NOX4
AVPR2	HDAC8		M3K3	AVPR2
NAE1	RET4		MP2K4	NAE1
BCHE	CD1A			BCHE
ACHE	LEG2			ACHE
BACE1	BST1			BACE1
PDE5A	TYSY			PDE5A
GSK3B	ELNE			GSK3B
	NR1I2			HCK
	PYRD			CAH2
	LCK			CAH1
	TGFR1			EST1
	MMP9			CHLE
	JAK3			ANGI
	ARGI1			LYAM3
	IL2			ALBU
	ARSA			APOA2
	ERBB4			STS
	ALDOA			GLCM
	GLYC			CAH12
	DHSO			EPHB4
	CATK			NGAL
	PAK6			AMPM1
	G6PI			BRAF1
	MMP13			TTHY
	CD5R1			DUS6
	FABP6			CCNA2
	HXK4			NOS3
	AOFB			PDE4D
	RAB5A			ADA17
	VDR			CFAB
	GSTT2			MIF
	CATS			THRB
	CLK1			NQO1
	A1AT			ANDR
	XIAP			SHBG
	MK01			DYR
	ST1E1			CHK1
	IMPA1			LKHA4
	HMDH			ALDR
	LEG3			CACP
	ZAP70			PNPH
	RENI			AKT1
	KTHY			RXRA
	CATG			BAG1
	NEP			AK1C3
	NR1H4			PPARG
	RASH			CTNA1
	TPH1			PDPK1
	GCR			MCR
	OAT			ADHX
	IMDH1			VTDB
	FABPH			FGFR1
	DPEP1			DCK
	STAT1			ISG20
	FPPS			UROK
	MMP2			CCNT1
	ADK			MMP8
	NR1H3			KIF11
	DPP4			FA10
	RARA			PTN1
	TRYB2			HS90A
	KPYR			TGM2
	DCAM			SAHH
	GSTM2			HXK1
	HINT1			PTN11
	KIT			PH4H
	RAF1			IMDH2
	GSTM1			PRGR
	FABP7			CATB
	GALE			PDE4B
	TGFB2			CFAD
	MP2K1			PDE3B
	TIE2			JAK2
	RARB			ACK1
	CD209			CDD
	ARGI2			DHI1
	PUR2			MMP7
	PUR9			KSYK
	PPARA			AMPM2
	MMP16			PTGD2
	LYAM2			NR1H2
	FIBG			GSTP1
	NOS2			TGM3
	FKB1B			PDK2
	S10A9			RB11A
	CCL5			TPIS
	ADA33			FKB1A
	GMPR1			CP2C9
	PIMT			FA7
	FA11			HDAC8
	CASP3			RET4
	FOLH1			CD1A
	RXRB			LEG2
	AMYP			BST1
	CASP1			TYSY
	RARG			ELNE
	DAPK1			NR1I2
	NDKB			PYRD
	RORA			TGFR1
	LGUL			JAK3
	APAF			ARGI1
	RAC1			IL2
	RAN			ARSA
				ERBB4
				ALDOA
				GLYC
				DHSO
				CATK
				PAK6
				G6PI
				CD5R1
				FABP6
				HXK4
				AOFB
				RAB5A
				VDR
				GSTT2
				CATS
				CLK1
				A1AT
				XIAP
				MK01
				ST1E1
				IMPA1
				HMDH
				LEG3
				ZAP70
				RENI
				KTHY
				CATG
				NEP
				NR1H4
				RASH
				TPH1
				GCR
				OAT
				IMDH1
				FABPH
				DPEP1
				STAT1
				FPPS
				ADK
				NR1H3
				DPP4
				RARA
				TRYB2
				KPYR
				DCAM
				GSTM2
				HINT1
				RAF1
				GSTM1
				FABP7
				GALE
				TGFB2
				MP2K1
				TIE2
				RARB
				CD209
				ARGI2
				PUR2
				PUR9
				PPARA
				MMP16
				LYAM2
				FIBG
				FKB1B
				S10A9
				CCL5
				ADA33
				GMPR1
				PIMT
				FA11
				CASP3
				FOLH1
				RXRB
				AMYP
				CASP1
				RARG
				NDKB
				RORA
				LGUL
				APAF
				RAC1
				RAN
				CTSD
				TRIM24
				KLF5
				DUSP3
				THRA
				RORB
				CSNK2B
				HSD17B10
				HIF1A
				TDP1
				SLC6A5
				CAMKK2
				MAOA
				CHRM5
				CACNA1B
				SLC2A1
				CHRM4
				CDK5
				CDC25C
				NFE2L2
				KCNA5
				SERPINE1
				ADAM10
				GPR55
				GBA2
				ANPEP
				GGPS1
				PDE11A
				GPBAR1
				PRCP
				PIN1
				PSMB1
				EIF2AK1
				ERAP1
				NQO2
				CFTR
				CYP3A4
				DRD1
				NOX1
				C5AR1
				CHRM1
				GLS
				GUSB
				GLRA1
				DPP9
				FPR1
				PTGER1
				RPS6KA1
				MDM4
				CAPN1
				GABRA1
				CLK4
				NFKB1
				CHKA
				METAP2
				GRK5
				LGALS3
				ITK
				PDGFRA
				PTPN11
				CHUK
				KAT6A
				DPP7
				NTRK3
				F13A1
				TFPI
				KEAP1
				ACE
				CREB1
				CP1B1
				TPMT
				CP1A1
				MDR1
				CCNO
				ANTR2
				PLGF
				CCNE2
				AMY1A
				KCND3
				TNKS1
				CBS
				ELAV1
				VRK2
				MAT1
				ELAV3
				CCNB1
				CALM1
				AHR
				MAK
				SGMR1
				MRP1
				AVR2A
				CCNK
				LOX5
				DCOR
				CDKL5
				KCC4
				CDK9
				CDK13
				KC1AL
				MRCKB
				ST32A
				CCND1
				PI51C
				AK1BA
				TNKS2
				CAH13
				CDK15
				DOPO
				AOFA
				AVR2B
				CDK18
				COMT
				BGLR
				CATL2
				SIAT1
				PRKDC
				CILK1
				VEGFA
				CDK14
				DUSTY
				NR4A2
				CDK17
				STK35
				CELA1
				LOX12
				CAH7
				ACVR1
				KKCC1
				CCNE1
				CCNH
				DMPK
				LTK
				GRK1
				CDK2
				DCLK3
				MK15
				SL9A1
				MP2K3
				PHKG1
				ULK2
				EPHA5
				GRK7
				M3K3
				MP2K4

## Sheet: Table SII
Table SII. Top 10 enriched terms of biological process, cellular component and molecular function.
ID	Description	Gene ratio	Background ratio	P-value	Adjusted P-value	Q-value	Gene ID	Count	Type
GO:0000079	Regulation of cyclin-dependent protein serine/threonine kinase activity	6/30	94/18723	7.34038768118259x10-09	6.71274e-06	4.18691388966217x10-06	CCNB1/CCNA2/CCNE1/CCND1/CDK5R1/CCNE2	6	Biological process
GO:1904029	Regulation of cyclin-dependent protein kinase activity	6/30	98/18723	9.44790545173174x10-09	6.71274e-06	4.18691388966217x10-06	CCNB1/CCNA2/CCNE1/CCND1/CDK5R1/CCNE2	6	Biological process
GO:0030857	Negative regulation of epithelial cell differentiation	4/30	49/18723	1.07902943415096x10-06	0.0005111	0.000318787	STAT1/MMP9/CCND1/XDH	4	Biological process
GO:0050673	Epithelial cell proliferation	7/30	437/18723	4.60029398518744x10-06	0.00163425	0.00101933	STAT1/CCND1/ARG1/MMP12/XDH/AR/FABP7	7	Biological process
GO:0009410	Response to xenobiotic stimulus	7/30	462/18723	6.62545121269022x10-06	0.00188295	0.00117445	CCNB1/STAT1/CDK1/ABCC1/ARG1/RORA/LCK	7	Biological process
GO:0010971	Positive regulation of G2/M transition of mitotic cell cycle	3/30	27/18723	1.05796e-05	0.00231106	0.00144147	CCNB1/CDK1/CCND1	3	Biological process
GO:0045737	Positive regulation of cyclin-dependent protein serine/threonine kinase activity	3/30	29/18723	1.31878e-05	0.00231106	0.00144147	CCNB1/CCND1/CDK5R1	3	Biological process
GO:0062197	Cellular response to chemical stress	6/30	337/18723	1.34084e-05	0.00231106	0.00144147	CDK1/ABCC1/MMP9/MCL1/ARG1/MYLK	6	Biological process
GO:1902751	Positive regulation of cell cycle G2/M phase transition	3/30	30/18723	1.46373e-05	0.00231106	0.00144147	CCNB1/CDK1/CCND1	3	Biological process
GO:0071900	Regulation of protein serine/threonine kinase activity	6/30	359/18723	1.91766e-05	0.0025328	0.00157978	CCNB1/CCNA2/CCNE1/CCND1/CDK5R1/CCNE2	6	Biological process
GO:1902554	Serine/threonine protein kinase complex	7/30	81/19550	3.03172332618992x10-11	2.03191351195338x10-09	1.54812458053591x10-09	CCNB1/CCNA2/CDK1/CCNE1/CCND1/CDK5R1/CCNE2	7	Cellular component
GO:0000307	Cyclin-dependent protein kinase holoenzyme complex	6/30	42/19550	3.87031145133977x10-11	2.03191351195338x10-09	1.54812458053591x10-09	CCNB1/CCNA2/CDK1/CCNE1/CCND1/CCNE2	6	Cellular component
GO:1902911	Protein kinase complex	7/30	96/19550	1.02323880256764x10-10	3.58133580898673x10-09	2.72863680684703x10-09	CCNB1/CCNA2/CDK1/CCNE1/CCND1/CDK5R1/CCNE2	7	Cellular component
GO:0061695	Transferase complex, transferring phosphorus-containing groups	8/30	239/19550	2.05946892936565x10-09	5.40610593958482x10-08	4.11893785873129x10-08	CCNB1/CCNA2/CDK1/CCNE1/CCND1/CDK5R1/PIK3R1/CCNE2	8	Cellular component
GO:0005876	Spindle microtubule	2/30	72/19550	0.00544311	0.114305	0.0870898	CDK1/KIF11	2	Cellular component
GO:0031234	Extrinsic component of cytoplasmic side of plasma membrane	2/30	101/19550	0.0104623	0.158639	0.120868	TGM3/LCK	2	Cellular component
GO:0019898	Extrinsic component of membrane	3/30	309/19550	0.0115799	0.158639	0.120868	TGM3/LCK/PIK3R1	3	Cellular component
GO:0098687	Chromosomal region	3/30	348/19550	0.0159101	0.158639	0.120868	CCNB1/CDK1/TOP2A	3	Cellular component
GO:0000940	Outer kinetochore	1/30	12/19550	0.0182648	0.158639	0.120868	CCNB1	1	Cellular component
GO:0045120	Pronucleus	1/30	13/19550	0.0197722	0.158639	0.120868	CCNA2	1	Cellular component
GO:0016538	Cyclin-dependent protein serine/threonine kinase regulator activity	6/30	50/18368	1.68519240234114x10-10	3.30297710858864x10-08	1.82710334148566x10-08	CCNB1/CCNA2/CCNE1/CCND1/CDK5R1/CCNE2	6	Molecular function
GO:0019207	Kinase regulator activity	7/30	233/18368	7.66949509389067x10-08	7.51610519201286x10-06	4.15767365616179x10-06	CCNB1/CCNA2/CCNE1/CCND1/CDK5R1/PIK3R1/CCNE2	7	Molecular function
GO:0019887	Protein kinase regulator activity	6/30	204/18368	8.2898026954332x10-07	5.416e-05	2.99596e-05	CCNB1/CCNA2/CCNE1/CCND1/CDK5R1/CCNE2	6	Molecular function
GO:0030283	Testosterone dehydrogenase (NADP) activity	2/30	11/18368	0.000140543	0.00649115	0.0035907	HSD17B1/HSD17B2	2	Molecular function
GO:0061575	Cyclin-dependent protein serine/threonine kinase activator activity	2/30	13/18368	0.000198911	0.00649115	0.0035907	CCNB1/CDK5R1	2	Molecular function
GO:0072582	17-β-hydroxysteroid dehydrogenase (NADP+) activity	2/30	13/18368	0.000198911	0.00649115	0.0035907	HSD17B1/HSD17B2	2	Molecular function
GO:0044594	17-β-hydroxysteroid dehydrogenase (NAD+) activity	2/30	14/18368	0.000231827	0.00649115	0.0035907	HSD17B1/HSD17B2	2	Molecular function
GO:0001221	Transcription coregulator binding	3/30	78/18368	0.00027537	0.00674656	0.00373198	STAT1/RORA/AR	3	Molecular function
GO:0004303	Estradiol 17-β-dehydrogenase activity	2/30	18/18368	0.000388194	0.00845401	0.00467649	HSD17B1/HSD17B2	2	Molecular function
GO:0005496	Steroid binding	3/30	100/18368	0.000571302	0.0111975	0.00619412	HSD17B1/RORA/AR	3	Molecular function
GO, Gene Ontology.

## Sheet: Table SIII
Table SIII. Top 20 enriched terms of Kyoto Encyclopedia of Genes and Genomes pathways.
ID	Description	Gene ratio	Background ratio	P-value	Adjusted P-value	Q-value	Gene ID	Count
hsa05206	MicroRNAs in cancer	7/26	312/8535	2.9448e-05	0.000574236	0.000406848	ABCC1/MMP9/MCL1/CCNE1/CCND1/PIK3R1/CCNE2	7
hsa04218	Cellular senescence	7/26	157/8535	3.05714292272144x10-07	2.9295e-05	2.07556e-05	CCNB1/CCNA2/CDK1/CCNE1/CCND1/PIK3R1/CCNE2	7
hsa05165	Human papillomavirus infection	6/26	333/8535	0.000400168	0.00445902	0.00315922	STAT1/CCNA2/CCNE1/CCND1/PIK3R1/CCNE2	6
hsa05166	Human T-cell leukemia virus 1 infection	6/26	224/8535	4.53062e-05	0.000755039	0.000534947	CCNA2/CCNE1/CCND1/LCK/PIK3R1/CCNE2	6
hsa05203	Viral carcinogenesis	6/26	205/8535	2.7495e-05	0.000574236	0.000406848	CCNA2/CDK1/CCNE1/CCND1/PIK3R1/CCNE2	6
hsa05169	Epstein-Barr virus infection	6/26	204/8535	2.67447e-05	0.000574236	0.000406848	STAT1/CCNA2/CCNE1/CCND1/PIK3R1/CCNE2	6
hsa05161	Hepatitis B	6/26	163/8535	7.42306114949074x10-06	0.0002316	0.000164089	STAT1/CCNA2/MMP9/CCNE1/PIK3R1/CCNE2	6
hsa04110	Cell cycle	6/26	158/8535	6.20175117113945x10-06	0.0002316	0.000164089	CCNB1/CCNA2/CDK1/CCNE1/CCND1/CCNE2	6
hsa05215	Prostate cancer	6/26	98/8535	3.75577144942432x10-07	2.9295e-05	2.07556e-05	MMP9/CCNE1/CCND1/PIK3R1/AR/CCNE2	6
hsa04151	PI3K-AKT signaling pathway	5/26	362/8535	0.00420302	0.0265452	0.0188074	MCL1/CCNE1/CCND1/PIK3R1/CCNE2	5
hsa04114	Oocyte meiosis	5/26	139/8535	5.32399e-05	0.000755039	0.000534947	CCNB1/CDK1/CCNE1/AR/CCNE2	5
hsa05162	Measles	5/26	139/8535	5.32399e-05	0.000755039	0.000534947	STAT1/CCNE1/CCND1/PIK3R1/CCNE2	5
hsa04115	p53 signaling pathway	5/26	75/8535	2.60777544542236x10-06	0.000135604	9.60759e-05	CCNB1/CDK1/CCNE1/CCND1/CCNE2	5
hsa04630	JAK-STAT signaling pathway	4/26	168/8535	0.0015437	0.0123321	0.00873734	STAT1/MCL1/CCND1/PIK3R1	4
hsa05226	Gastric cancer	4/26	150/8535	0.00101382	0.00988475	0.00700336	CCNE1/CCND1/PIK3R1/CCNE2	4
hsa04914	Progesterone-mediated oocyte maturation	4/26	111/8535	0.00032485	0.0038982	0.00276188	CCNB1/CCNA2/CDK1/PIK3R1	4
hsa05222	Small cell lung cancer	4/26	93/8535	0.000164372	0.00213684	0.00151396	CCNE1/CCND1/PIK3R1/CCNE2	4
hsa05207	Chemical carcinogenesis - receptor activation	3/26	215/8535	0.0267532	0.0927444	0.0657096	CCND1/PIK3R1/AR	3
hsa05170	Human immunodeficiency virus 1 infection	3/26	213/8535	0.0261144	0.0925874	0.0655983	CCNB1/CDK1/PIK3R1	3
hsa05205	Proteoglycans in cancer	3/26	204/8535	0.0233445	0.0846917	0.0600042	MMP9/CCND1/PIK3R1	3
